# Supplementary material for: Enhancing the efficiency and stability of inverted perovskite solar cells by using 6-(trifluoromethyl)nicotinic acid as a potent defect passivator
Source: Royal Society of Chemistry journal article supplement (doi:10.1039/d4tc02432j), 2024-01-01
Supplement: d4tc02432j1.pdf [file d4tc02432j1.pdf]

### Electronic Supplementary Information

## Enhancing the Efficiency and Stability of Inverted Perovskite Solar Cells by Using 6-(trifluoromethyl)nicotinic Acid as Potent Defect Passivator

Deepak Yadav<sup>a</sup>, Ramkrishna Das Adhikari<sup>b</sup>, Himangshu Baishya<sup>b</sup>, Mayur Jagdishbhai Patel<sup>a</sup>, and  
Parameswar Krishnan Iyer<sup>\*a,b</sup>

<sup>a</sup>Department of Chemistry, Indian Institute of Technology Guwahati, Guwahati-781039,  
Assam, India

<sup>b</sup>Centre for Nanotechnology, Indian Institute of Technology Guwahati, Guwahati-781039,  
Assam, India.

\*Email: [pki@iitg.ac.in](mailto:pki@iitg.ac.in)

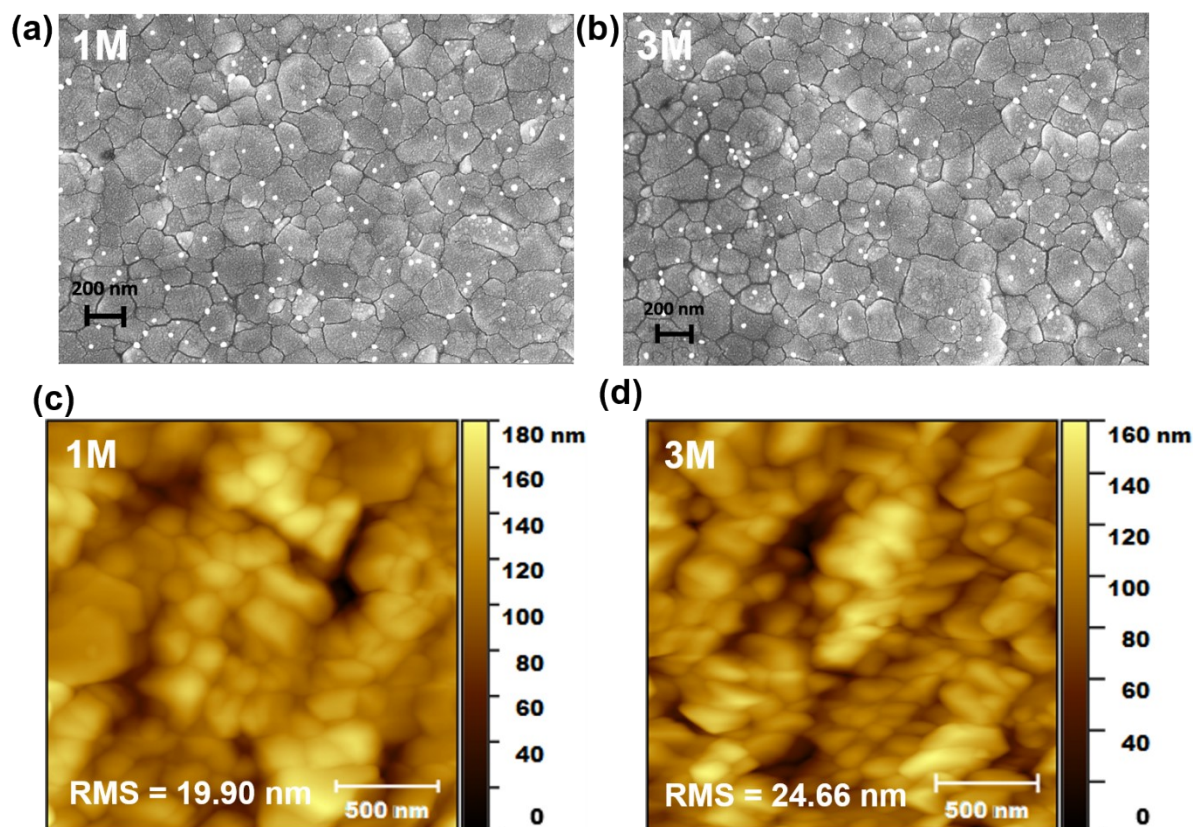

**Fig. S1:** (a, b) SEM and (c, d) AFM micrograph of 1M and 3M modified perovskite film.

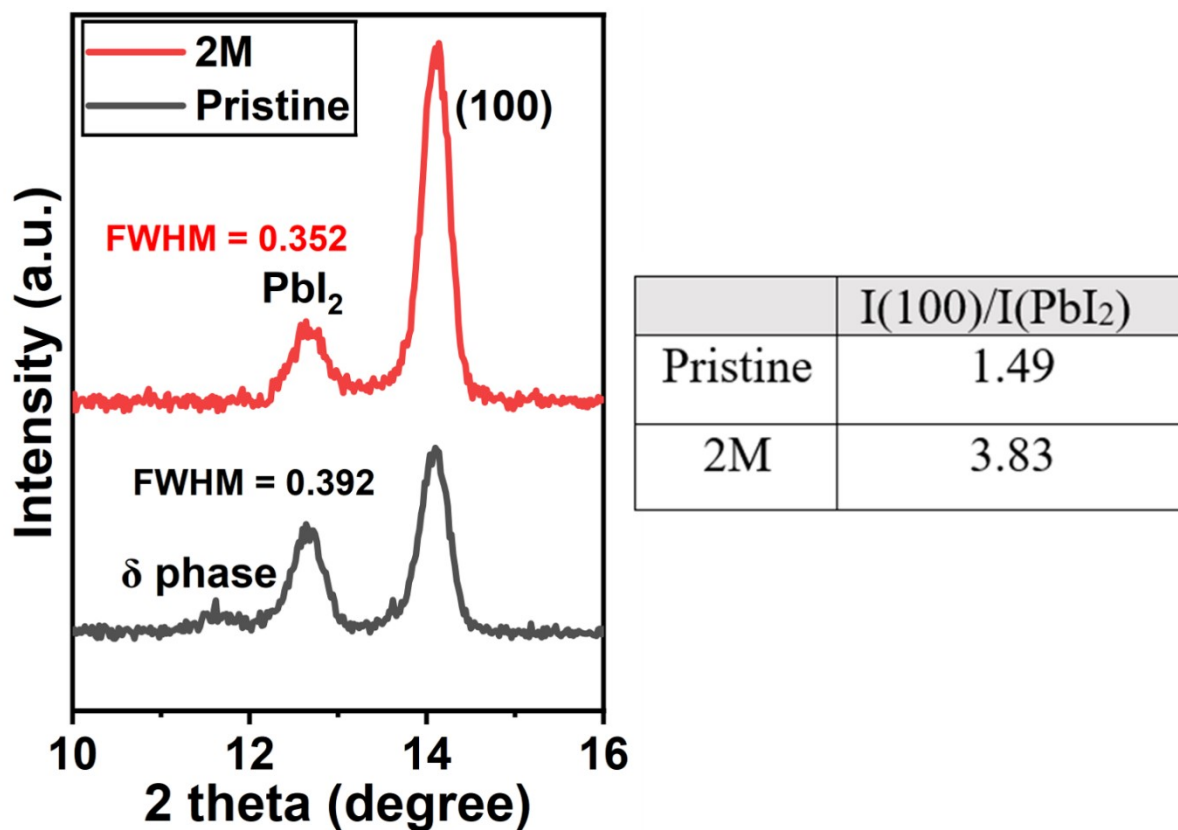

Fig. S2: FWHM and I(100)/I( $\text{PbI}_2$ ) ration value of the pristine and 2M perovskite film respectively.

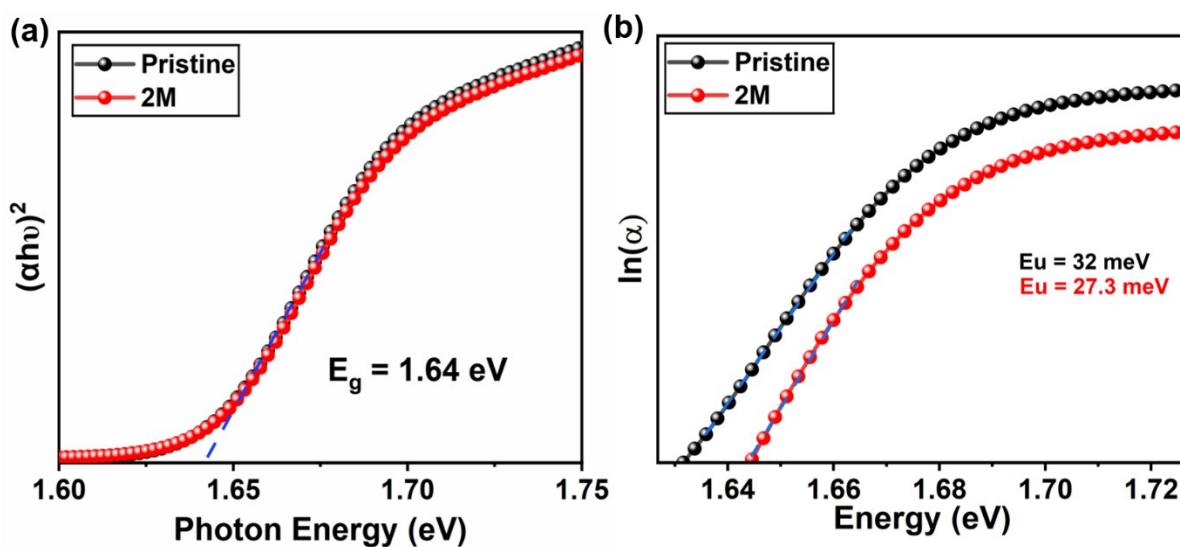

Fig. S3: (a) Tauc plot and (b) Urbach tail energy of the pristine and 2M perovskite film.

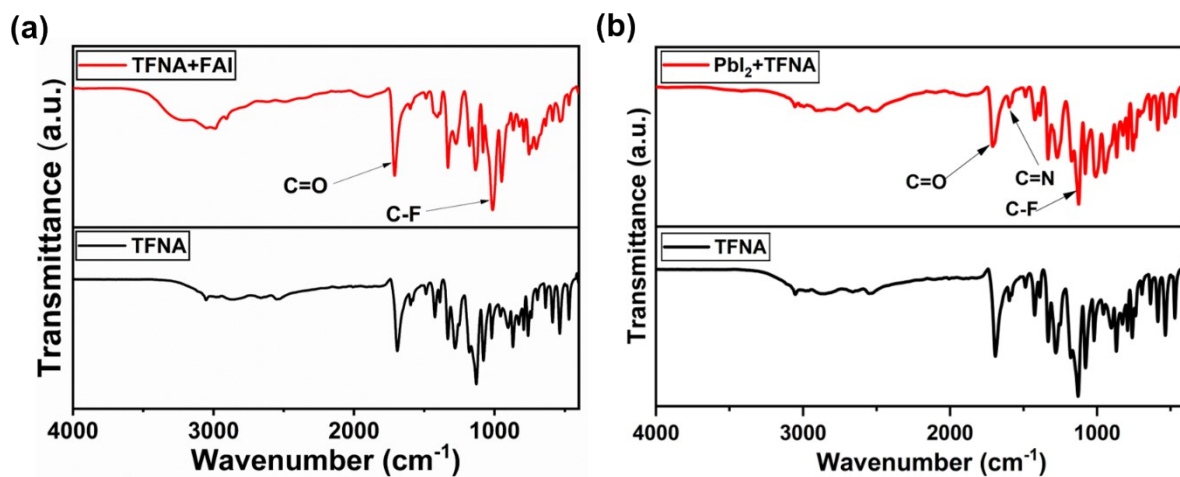

**Fig. S4:** Full range FTIR spectra of the additive molecule and its mixture with (a) FAI and (b)  $\text{PbI}_2$  precursors.

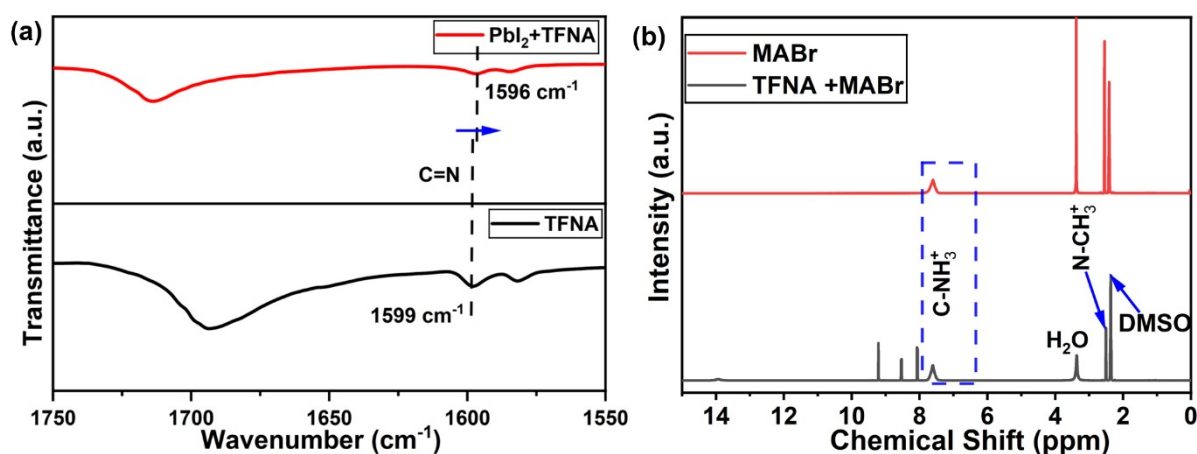

**Fig. S5:** (a) FTIR spectra of C=N stretching frequency of TFNA and TFNA+ $\text{PbI}_2$  (b)  $^1\text{H}$  NMR spectra of the additive molecule and its mixture with MABr in DMSO- $d_6$  solvent.

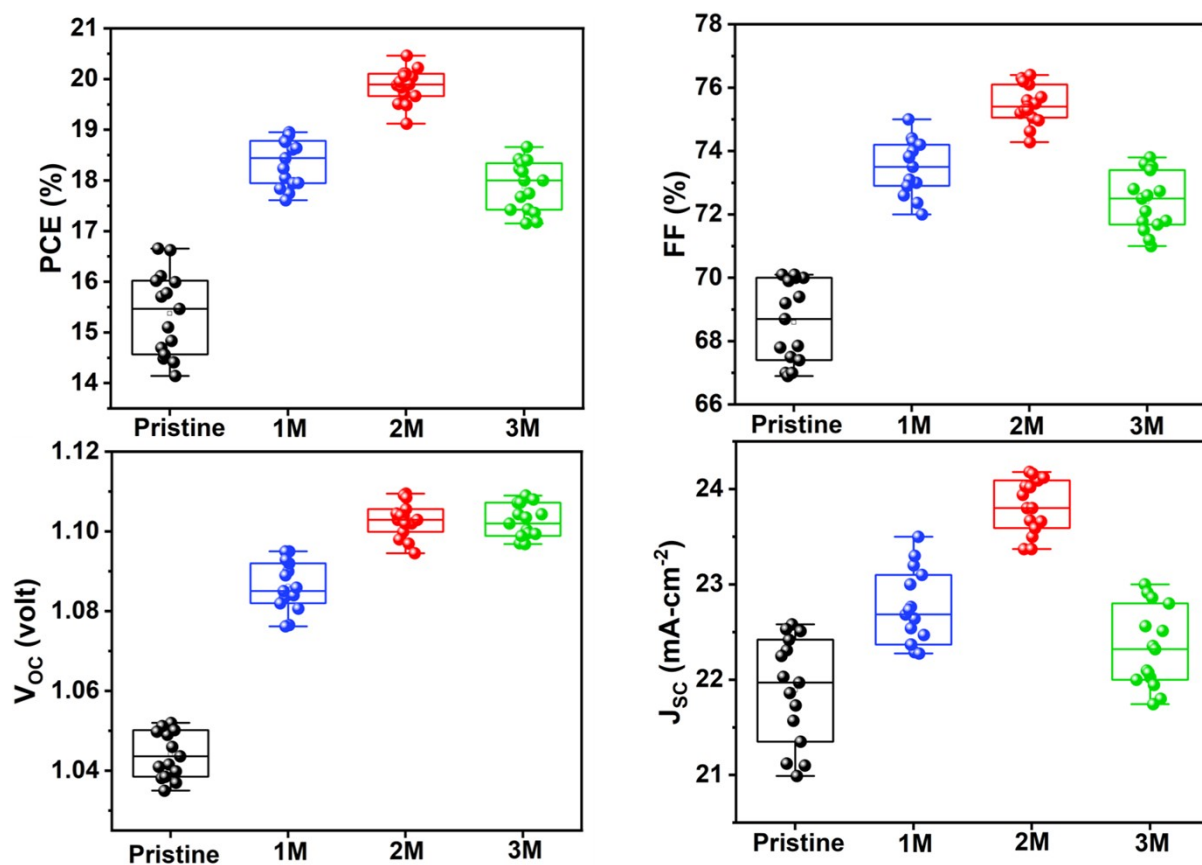

**Fig. S6:** Statistical distribution of PCE, FF,  $V_{oc}$ , and  $J_{sc}$  respectively for a batch of 15 pristine as well as all modified devices.

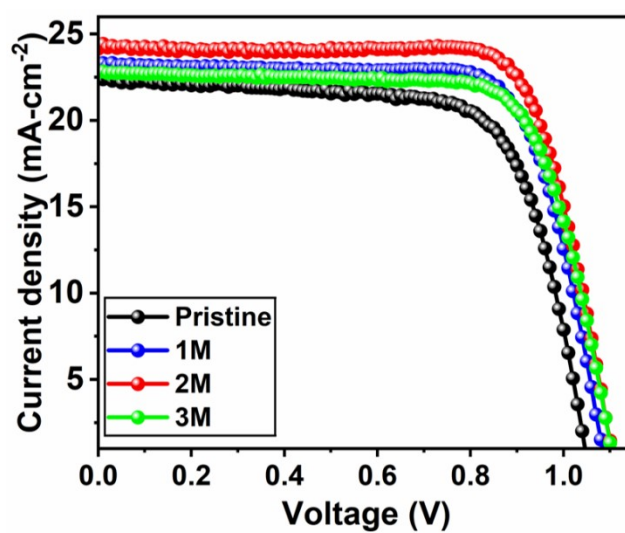

**Fig. S7:**  $J$ - $V$  curves of PSCs with different concentration of TFNA.

| Device   | J <sub>SC</sub> (mA-cm <sup>-2</sup> ) | V <sub>OC</sub> (Volt) | FF (%) | PCE (%) |
|----------|----------------------------------------|------------------------|--------|---------|
| Pristine | 22.56                                  | 1.052                  | 70.1   | 16.64   |
| 1M       | 23.20                                  | 1.090                  | 74.7   | 18.88   |
| 2M       | 24.16                                  | 1.108                  | 76.4   | 20.45   |
| 3M       | 22.80                                  | 1.109                  | 73.8   | 18.66   |

**Table S1** Device parameters of pristine and different concentration of TFNA additive based PSC.
